# Supplementary material for: Triple Benefits of Cardanol as Chain Stopper, Flame Retardant and Reactive Diluent for Greener Alkyd Coating
Source: MDPI journal article supplement (doi:10.3390/org4010009), 2023-03-15
Supplement: s1 [file s1]

Archive with 1 entries (1 files):
- organics-2149415-supplementary.pdf
